# Supplementary material for: UGGT1-mediated reglucosylation of N-glycan competes with ER-associated degradation of unstable and misfolded glycoproteins
Source: eLife journal article supplement (doi:10.7554/elife.93117), 2023-12-20

Fig. 1-Figure Supplement 1-Source data 2. Original gels corresponding to Fig1-Fig. Sup.1E-H.

Fig. Sup.1E

UGGT1-KO | UGGT2-KO | UGGT-DKO  
WT #1 #2 #1 #2 #1 #2

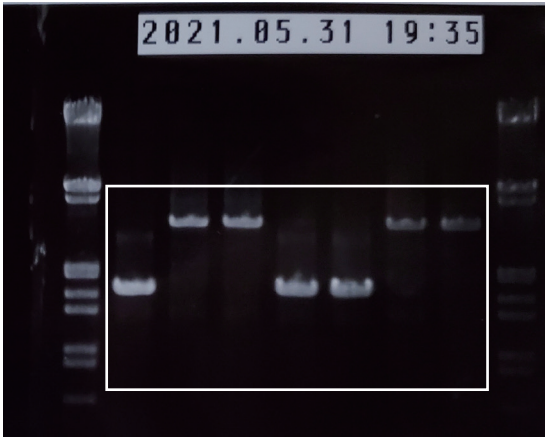

Fig. Sup.1F-1

UGGT1-KO | UGGT2-KO | UGGT-DKO  
WT #1 #2 #1 #2 #1 #2

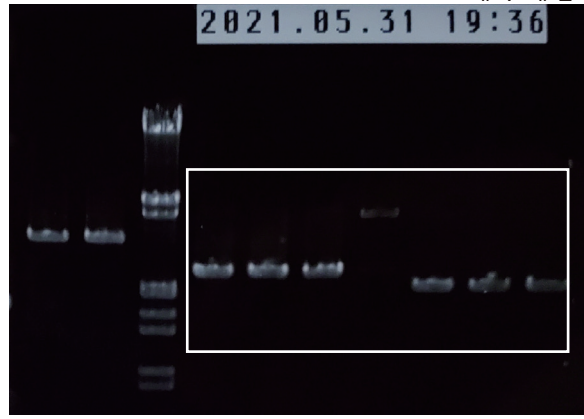

Fig. Sup.1F-2

UGGT2-KO  
WT #2 #2 #1

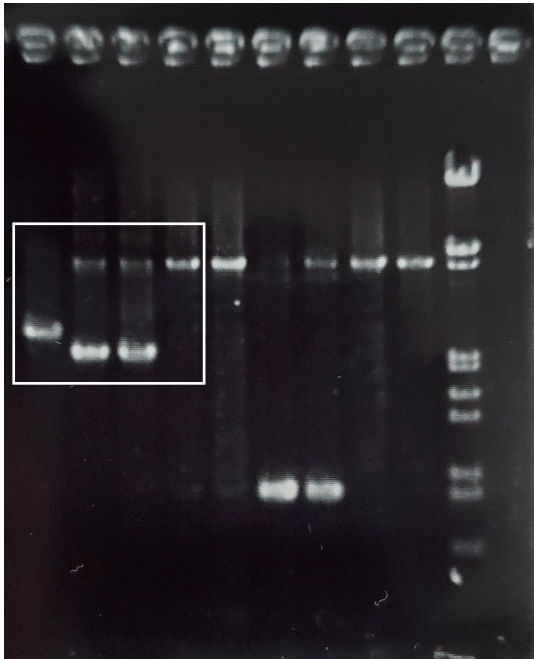

Fig. Sup.1G

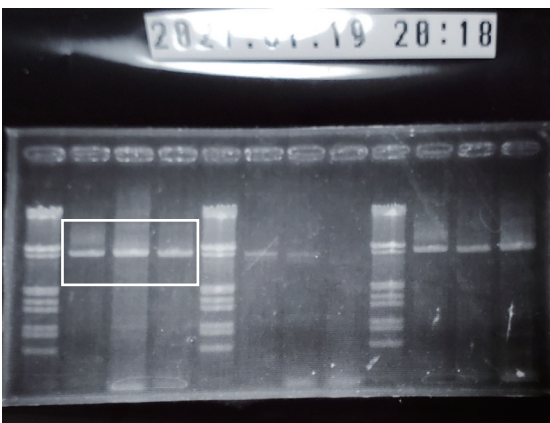

Fig. Sup.1H

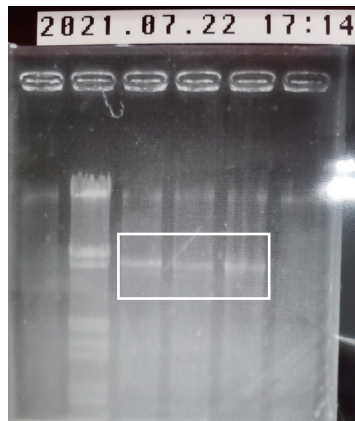

Supplement: fig1-figsupp1-data2 [file elife-93117-fig1-figsupp1-data2-v1.pdf]
