# Supplementary material for: UGGT1-mediated reglucosylation of N-glycan competes with ER-associated degradation of unstable and misfolded glycoproteins
Source: eLife journal article supplement (doi:10.7554/elife.93117), 2023-12-20

Fig. 1-Figure Supplement 2A-C Source data 2 Original membranes corresponding to Fig1-Fig. Sup.2A-2C.

Fig. Sup.2A

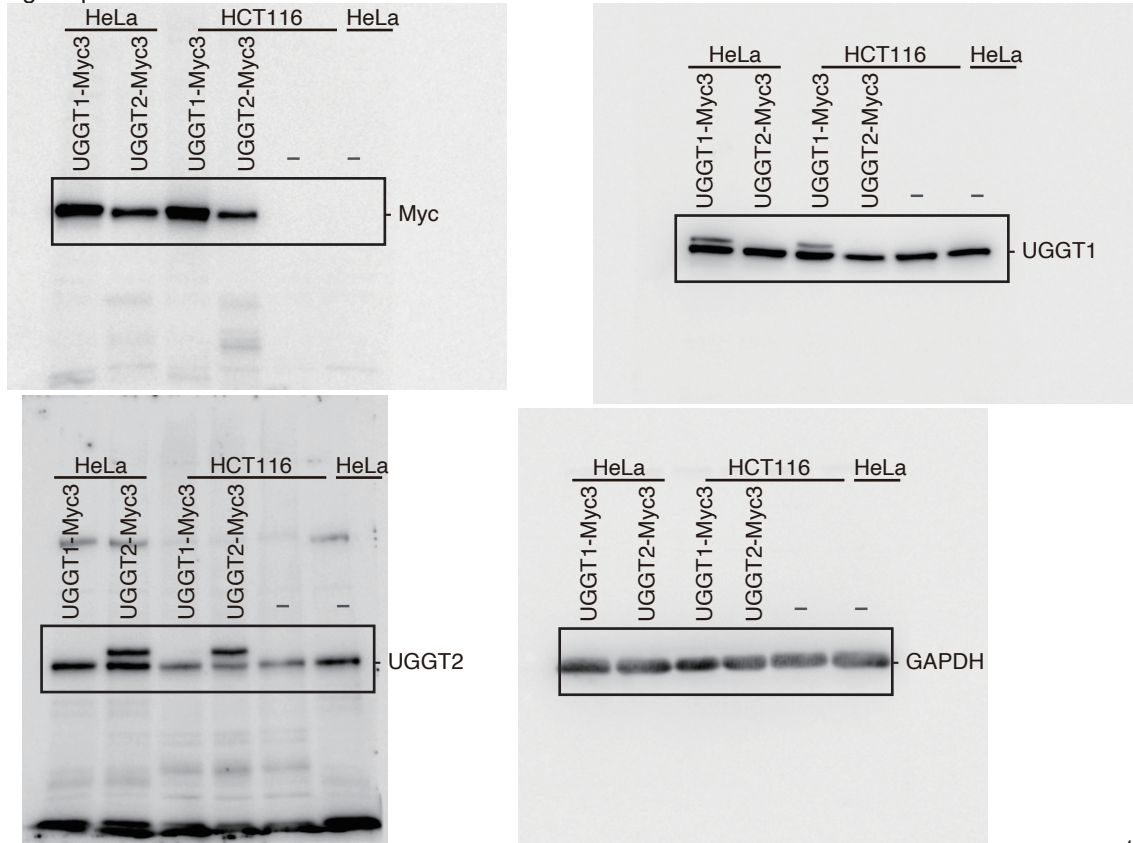

Fig. Sup.2B

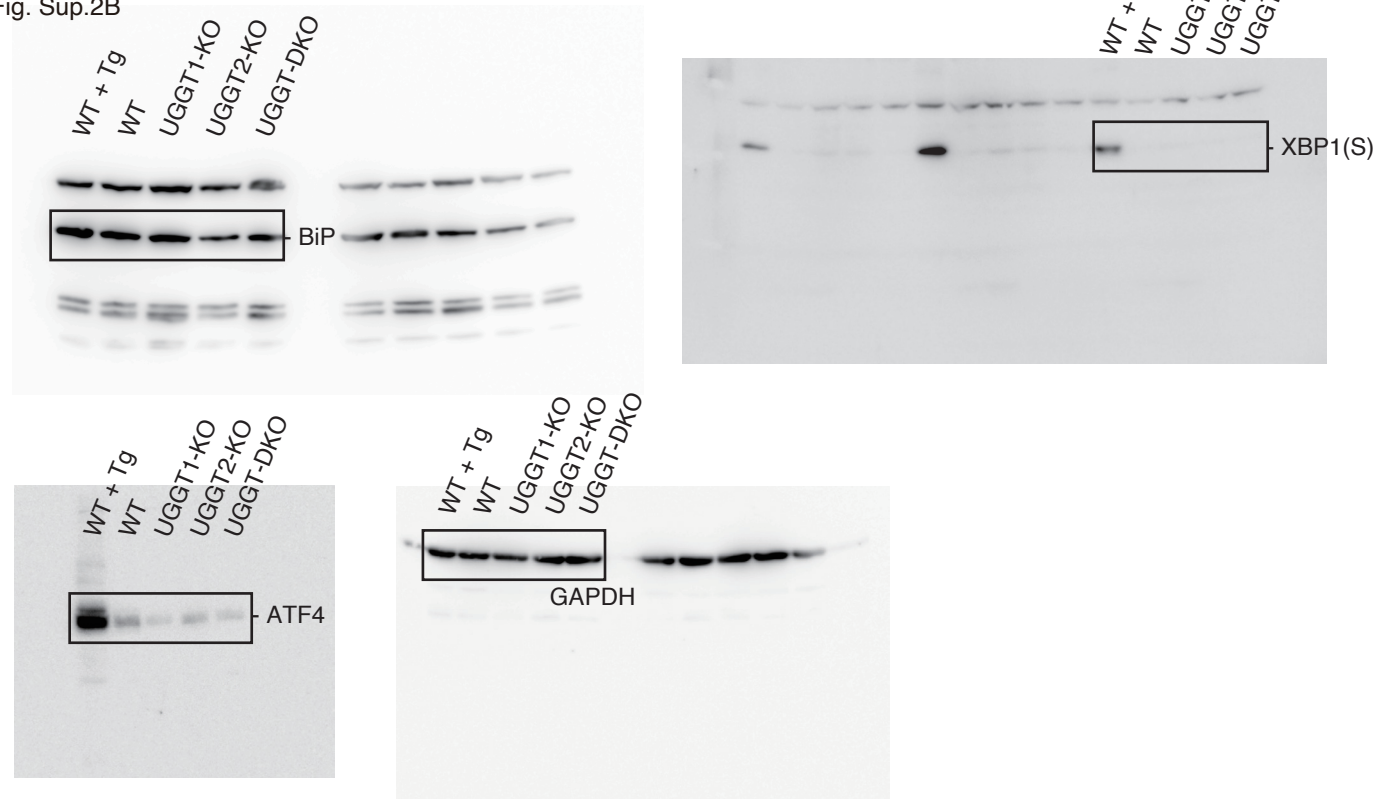

Fig. Sup.2C

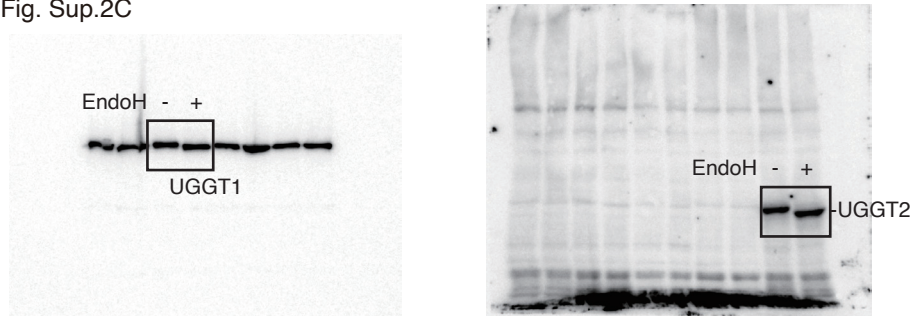

Supplement: fig1-figsupp2-data2 [file elife-93117-fig1-figsupp2-data2-v1.zip]
