# Supplementary material for: UGGT1-mediated reglucosylation of N-glycan competes with ER-associated degradation of unstable and misfolded glycoproteins
Source: eLife journal article supplement (doi:10.7554/elife.93117), 2023-12-20
Supplement: fig1-figsupp3-data1 [file elife-93117-fig1-figsupp3-data1-v1.zip]

Campus notebooks contain the best ruled foolscap

suitable for writing.

NOTEBOOK

# campus

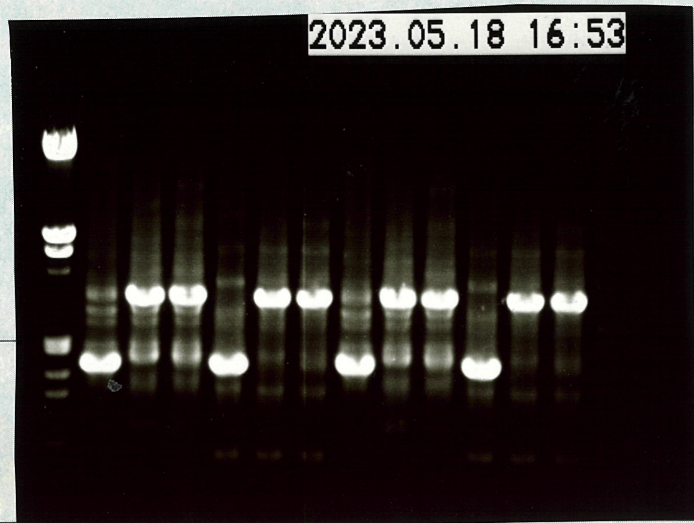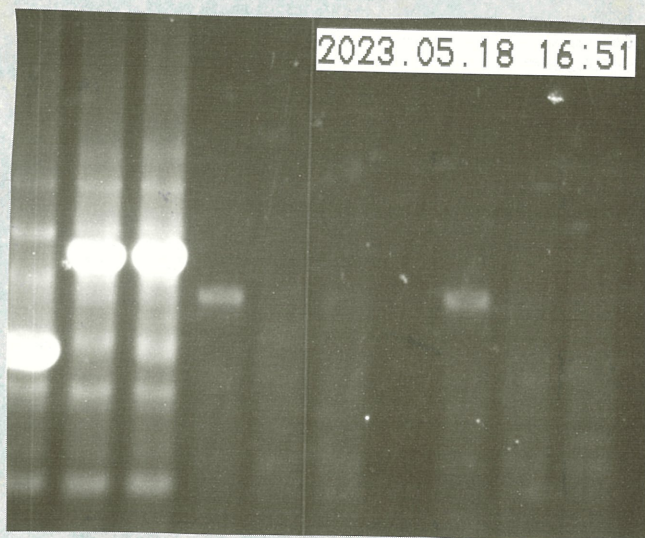

**B** 中横罫 6mm×41行 | 40枚 ノー201B

**KOKUYO**
