# Supplementary material for: UGGT1-mediated reglucosylation of N-glycan competes with ER-associated degradation of unstable and misfolded glycoproteins
Source: eLife journal article supplement (doi:10.7554/elife.93117), 2023-12-20
Supplement: fig1-figsupp6-data2 [file elife-93117-fig1-figsupp6-data2-v1.pdf]

Fig. 1-Figure Supplement 6 Original gels corresponding to Fig1-Fig. Sup.6A

Fig. Sup.6A

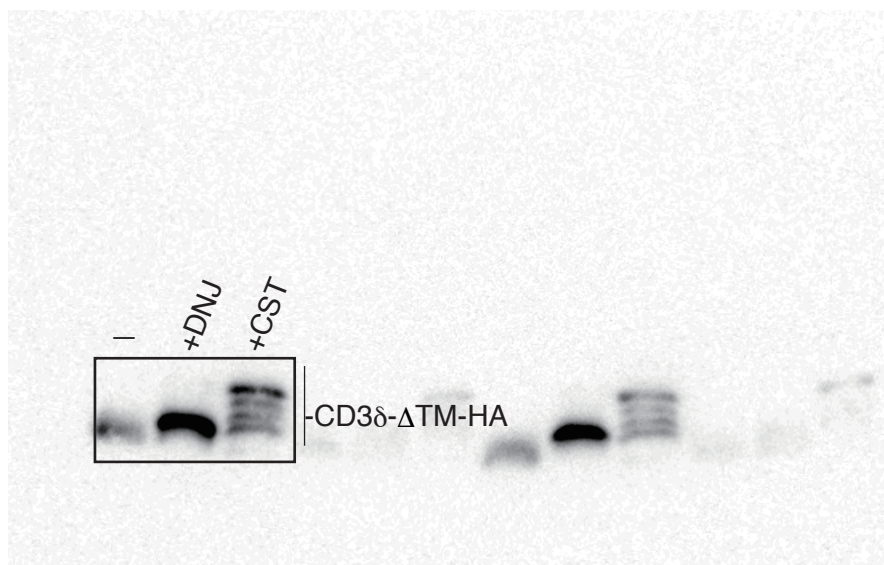

Fig. Sup.3F
