# Supplementary material for: UGGT1-mediated reglucosylation of N-glycan competes with ER-associated degradation of unstable and misfolded glycoproteins
Source: eLife journal article supplement (doi:10.7554/elife.93117), 2023-12-20
Supplement: fig3-figsupp1-data2 [file elife-93117-fig3-figsupp1-data2-v1.pdf]

Fig. 3-Figure Supplement 1 Source data 2 Original membranes corresponding to Fig3-Fig. Sup.3B.

Fig. Sup.3B

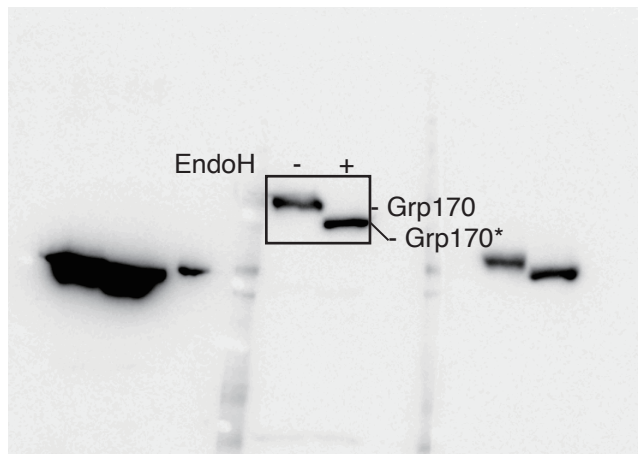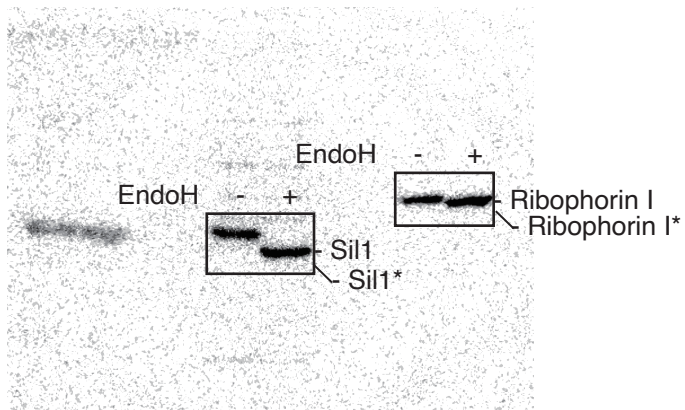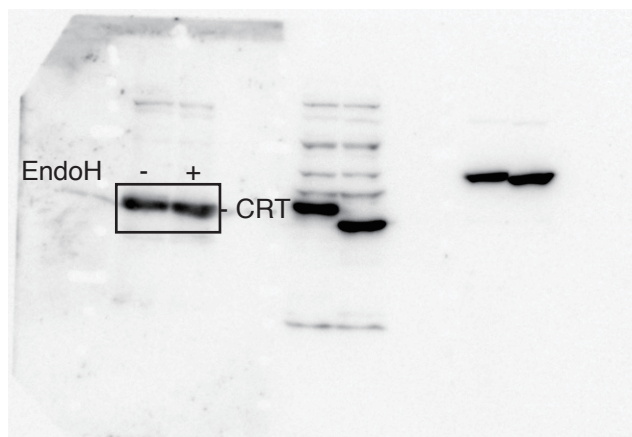

Fig. Sup.3F
