# Supplementary figures and images for: UGGT1-mediated reglucosylation of N-glycan competes with ER-associated degradation of unstable and misfolded glycoproteins
Source: eLife journal article supplement (doi:10.7554/elife.93117), 2023-12-20

Fig. 1D-H Source data 2 Original membranes corresponding to Fig1D-H  
Fig. 1D

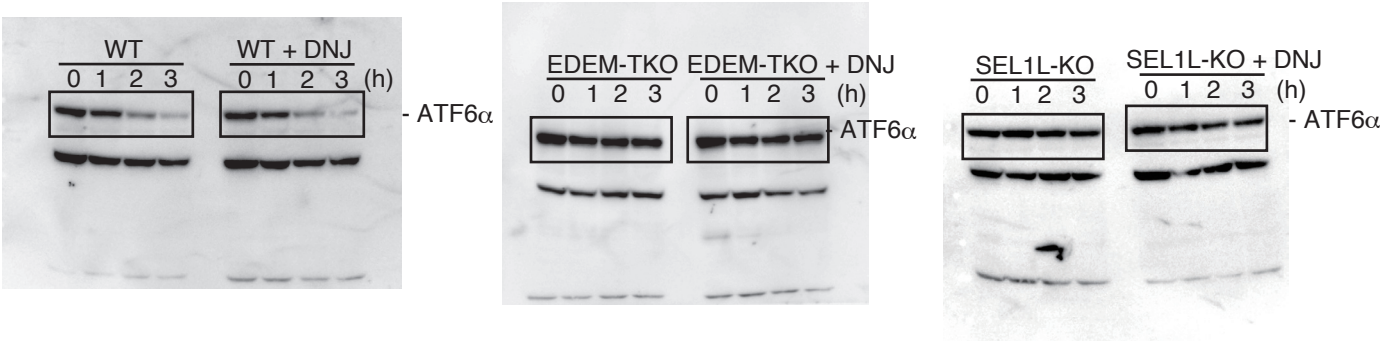

Fig. 1E

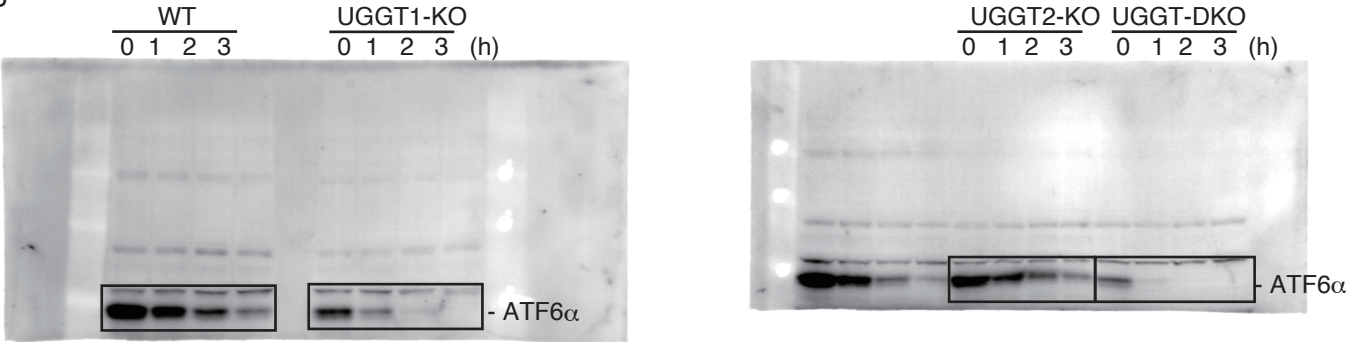

Fig. 1F

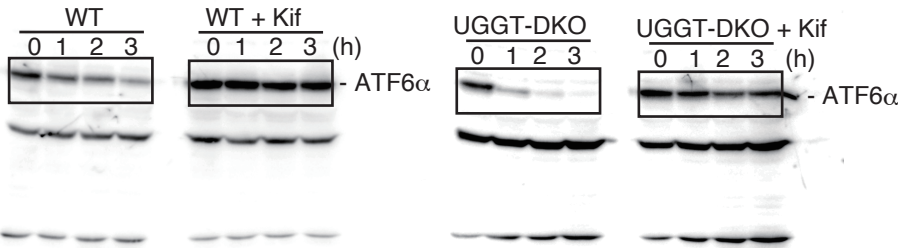

Fig. 1G

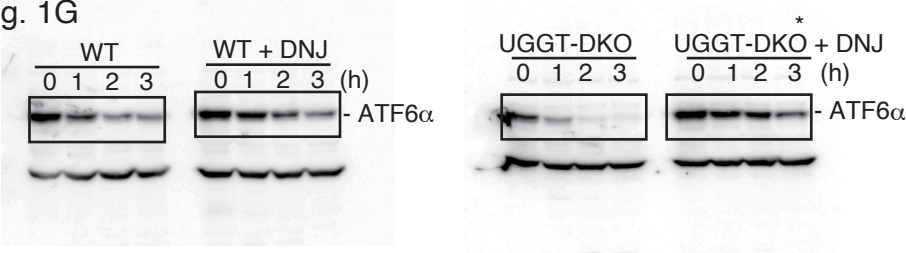

Fig. 1H

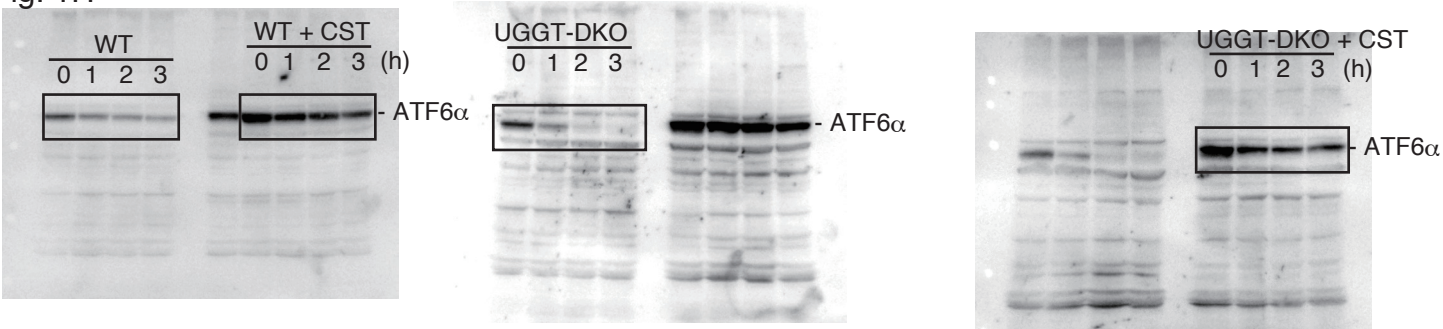

Supplement: fig1-data2 [file elife-93117-fig1-data2-v1.zip]

Fig. 1B-Source data 1 Original membranes corresponding to Fig1B.

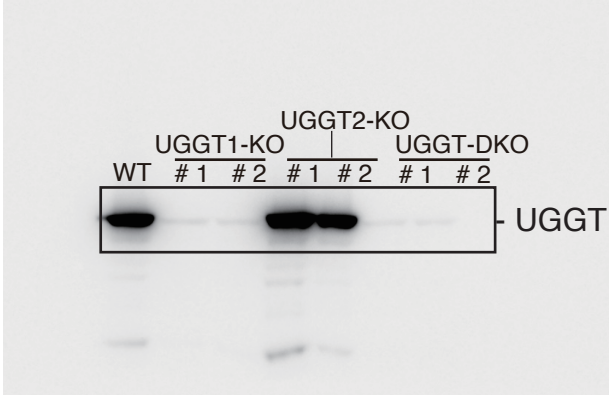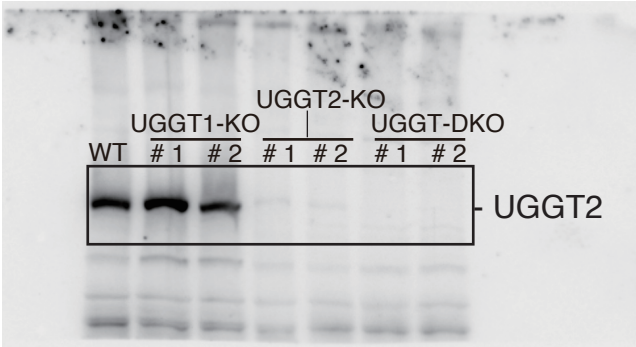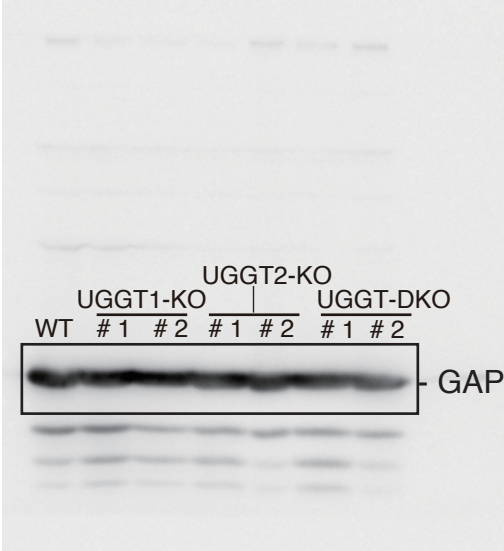

Supplement: fig1-data2 [file elife-93117-fig1-data2-v1.zip]

Fig. 2E Source data 2 Original gels corresponding to Fig. 2E.

Fig. 2E

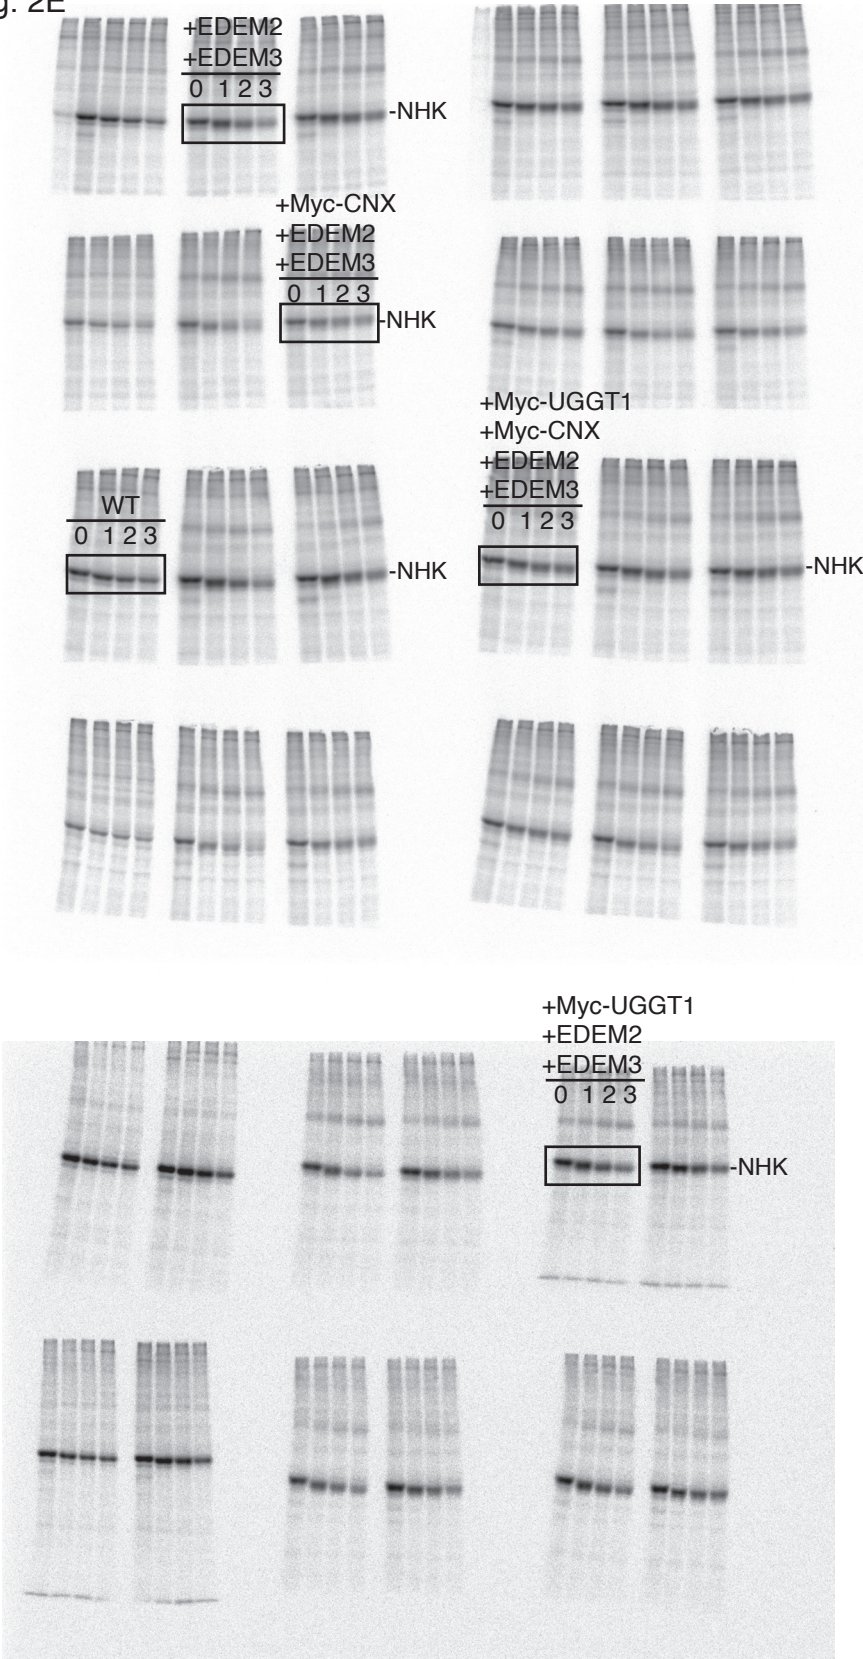

Supplement: fig2-data2 [file elife-93117-fig2-data2-v1.zip]

Fig. 2A Source data 2 Original gels corresponding to Fig2A

Fig. 2A

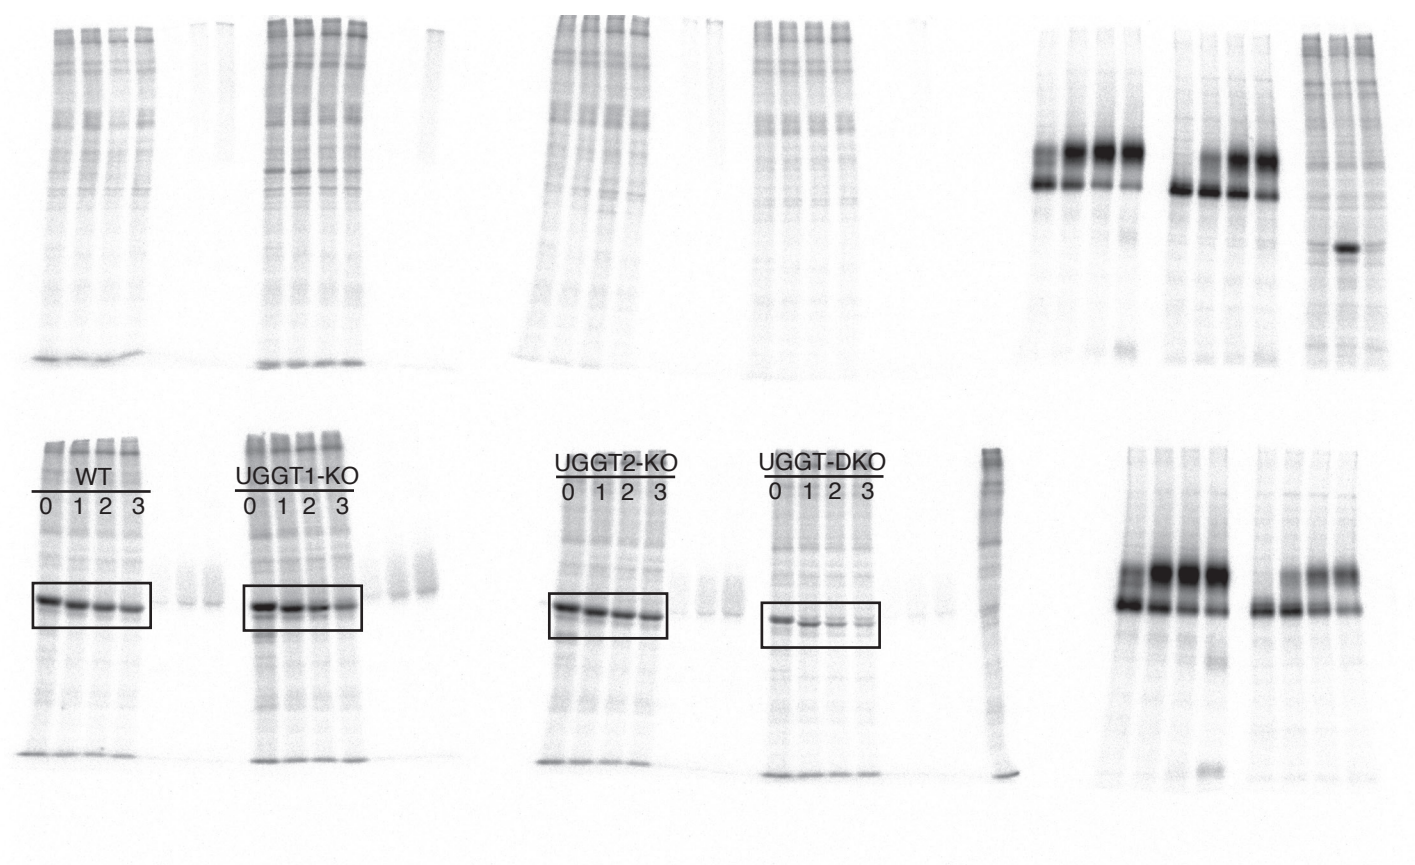

Supplement: fig2-data2 [file elife-93117-fig2-data2-v1.zip]

Fig. 2C Source data 2 Original gels corresponding to Fig2C

Fig. 2C

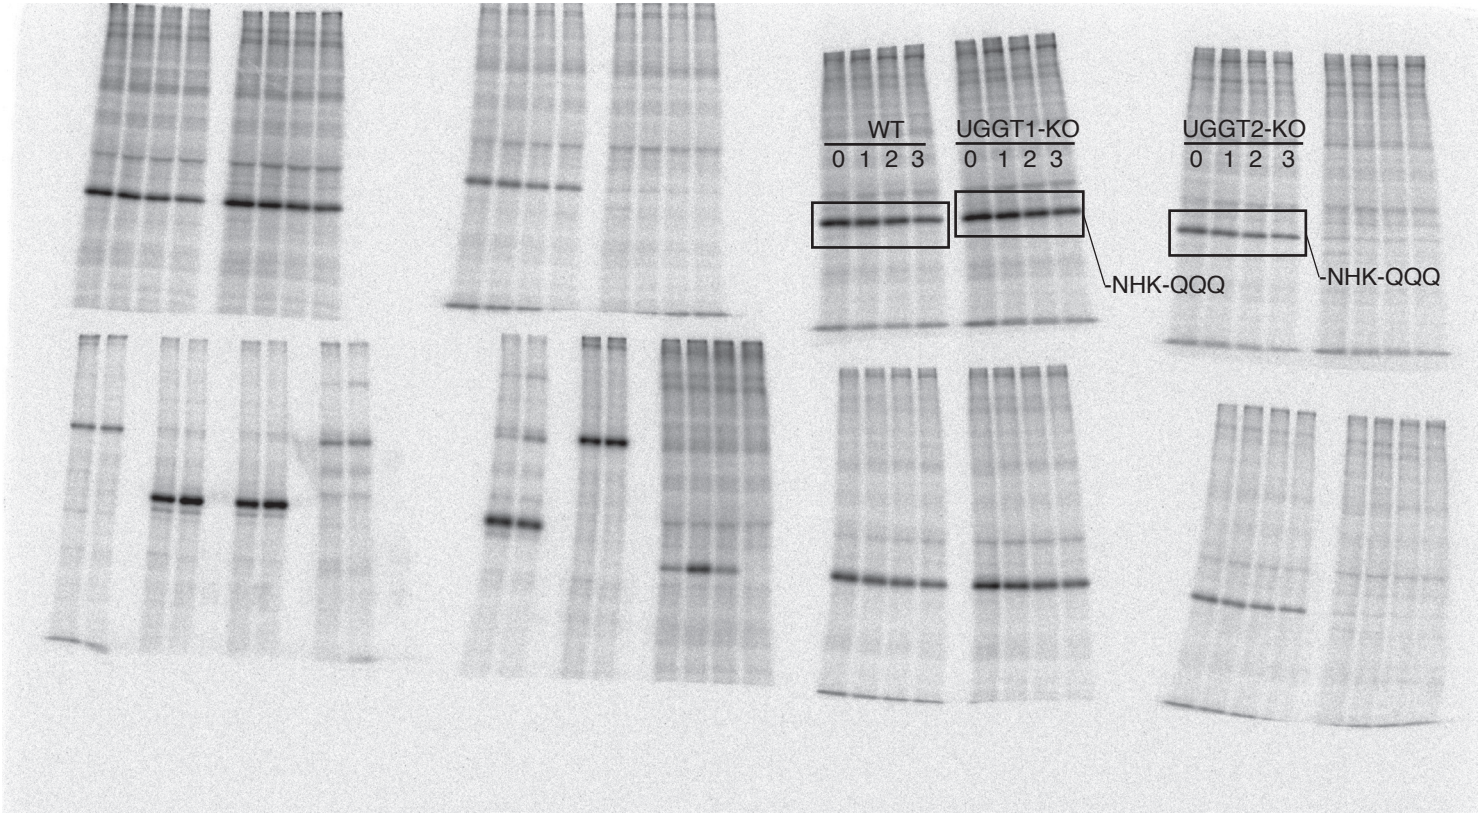

Supplement: fig2-data2 [file elife-93117-fig2-data2-v1.zip]

Fig. 2B Source data 2 Original gels corresponding to Fig2B

Fig. 2B

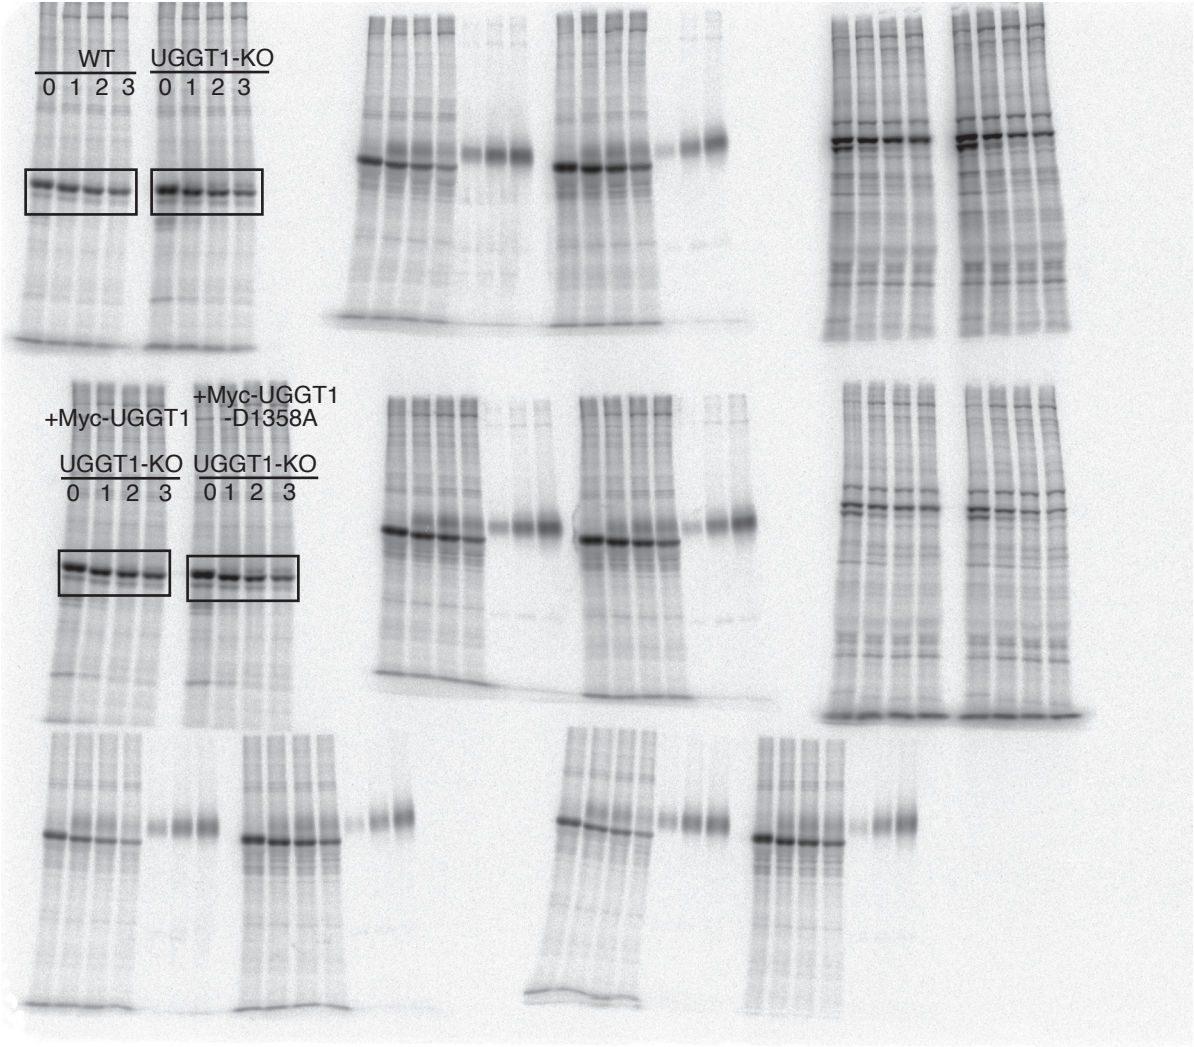

Supplement: fig2-data2 [file elife-93117-fig2-data2-v1.zip]

Fig. 2D

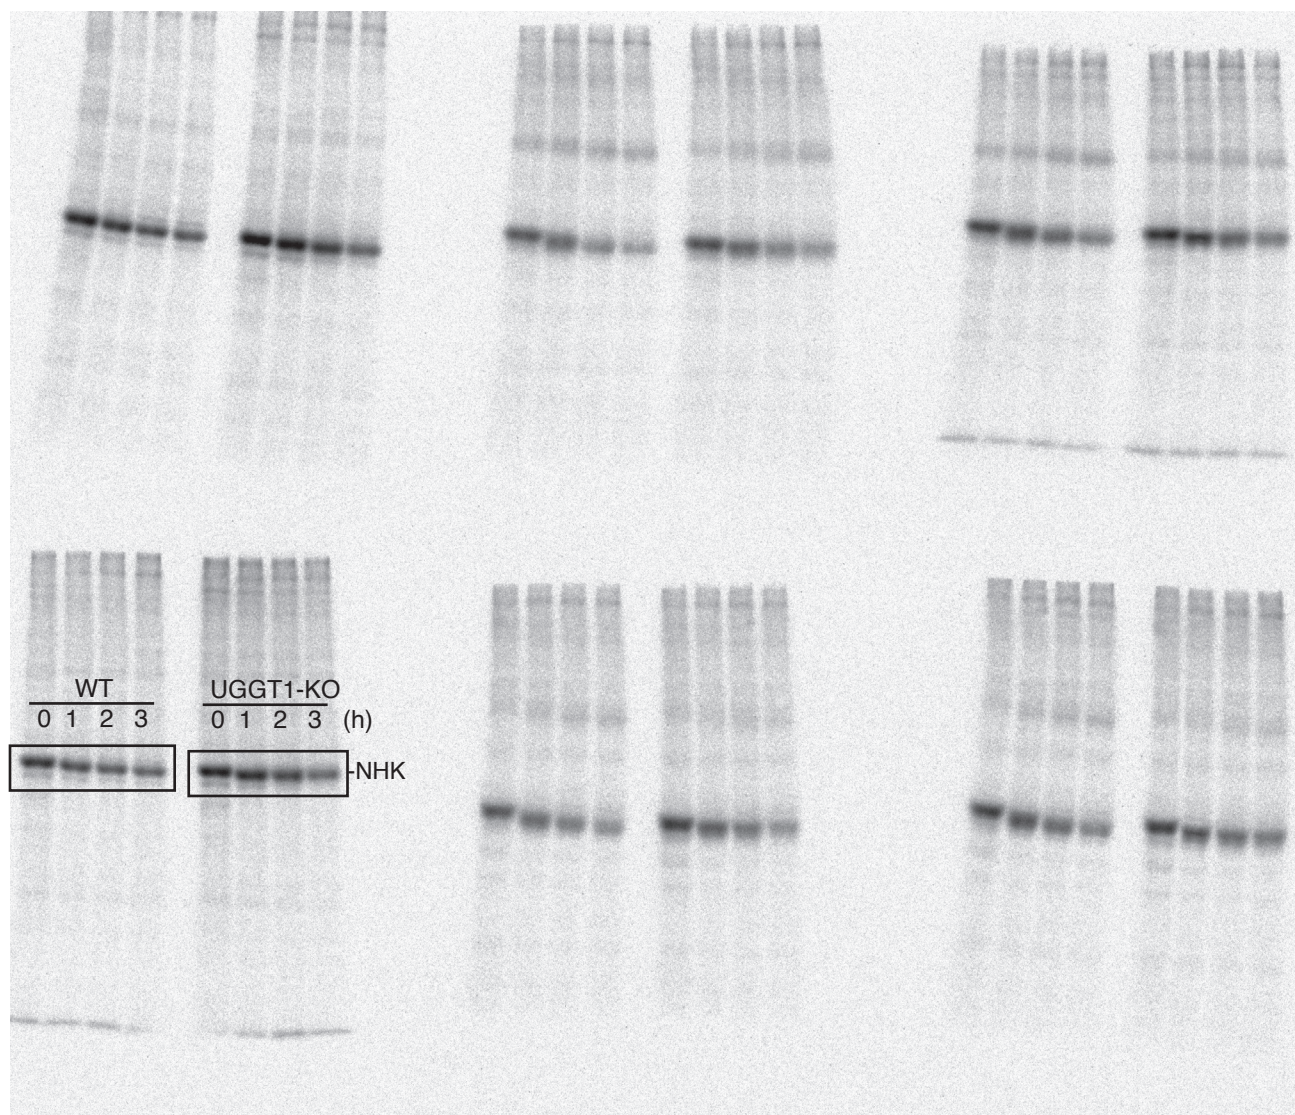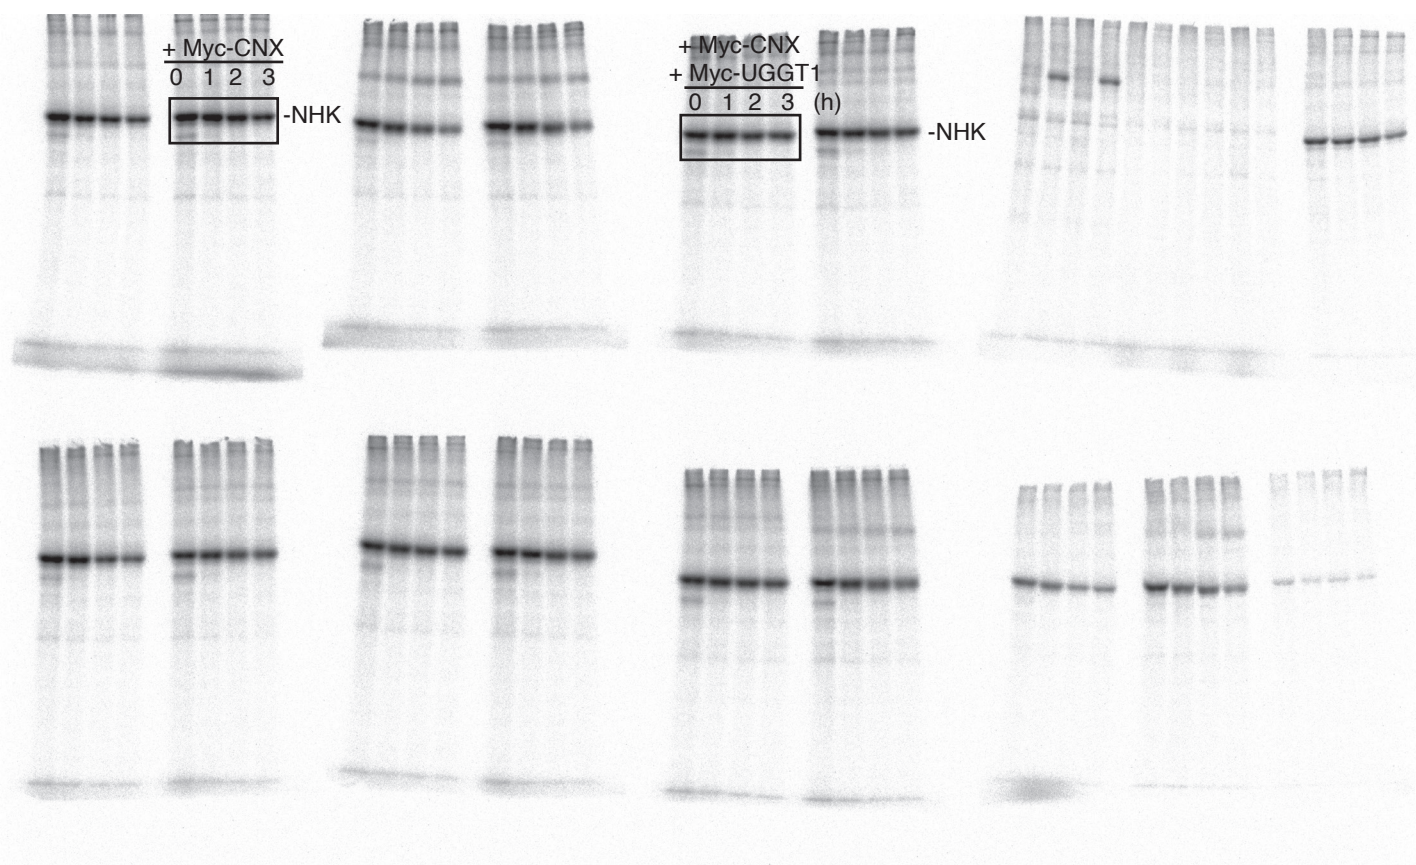

Supplement: fig2-data2 [file elife-93117-fig2-data2-v1.zip]

Fig. 3D

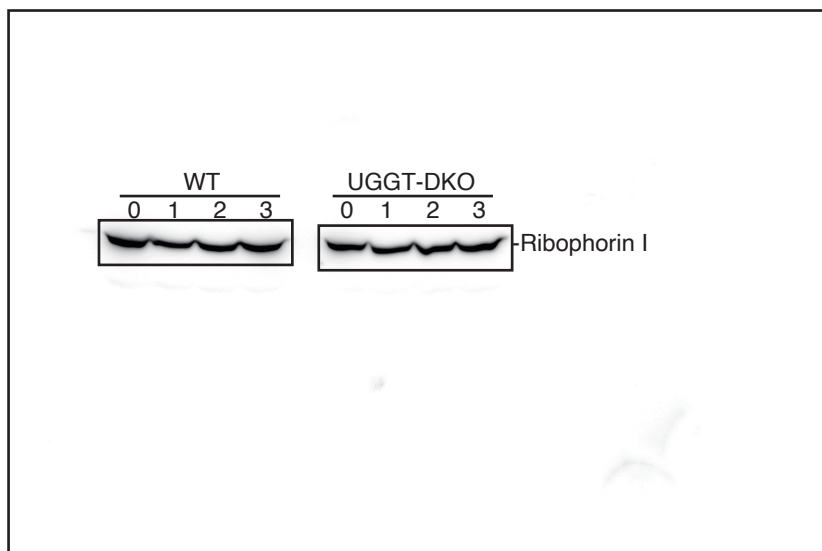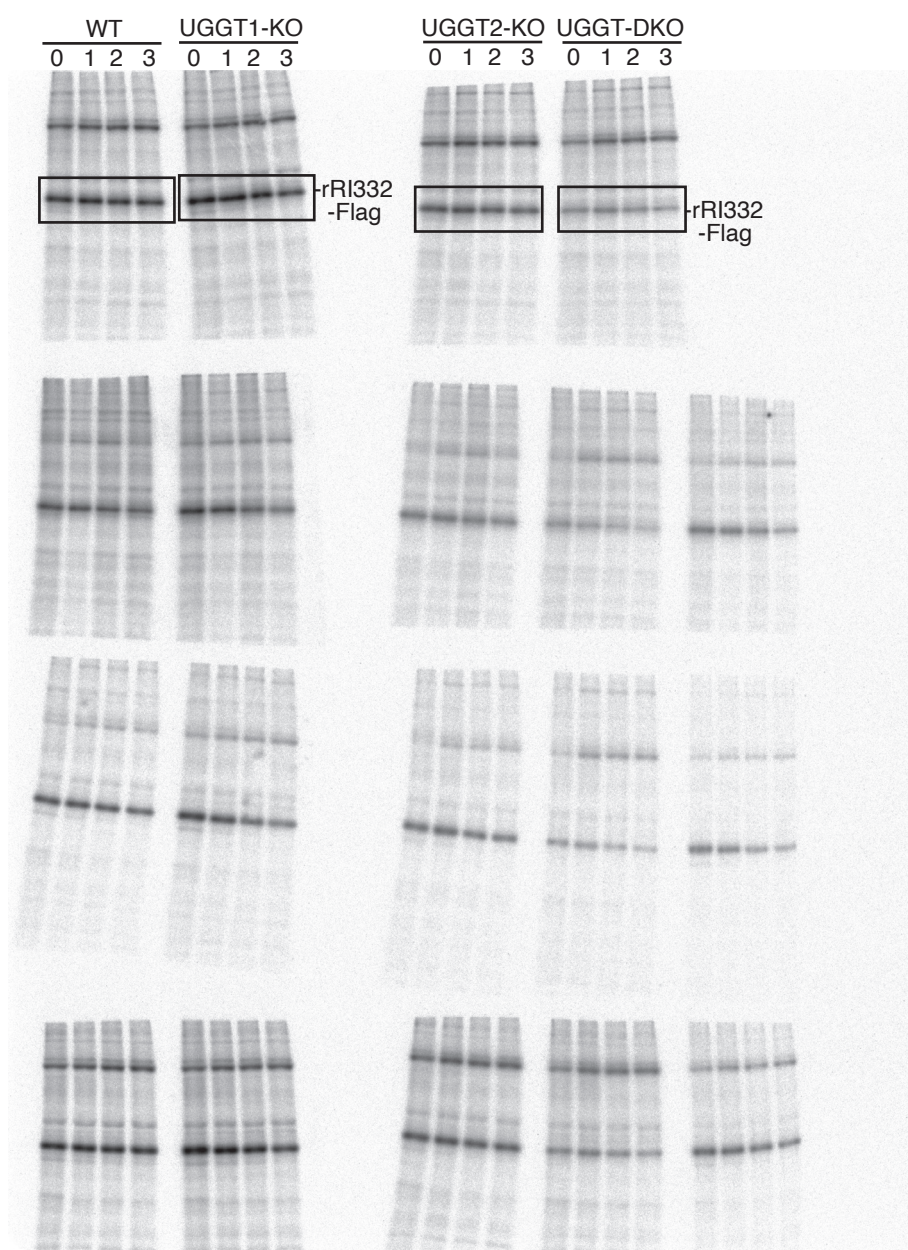

Supplement: fig3-data2 [file elife-93117-fig3-data2-v1.zip]

Fig. 3F Source data 2 Original gels corresponding to Fig. 3F

Fig. 3F

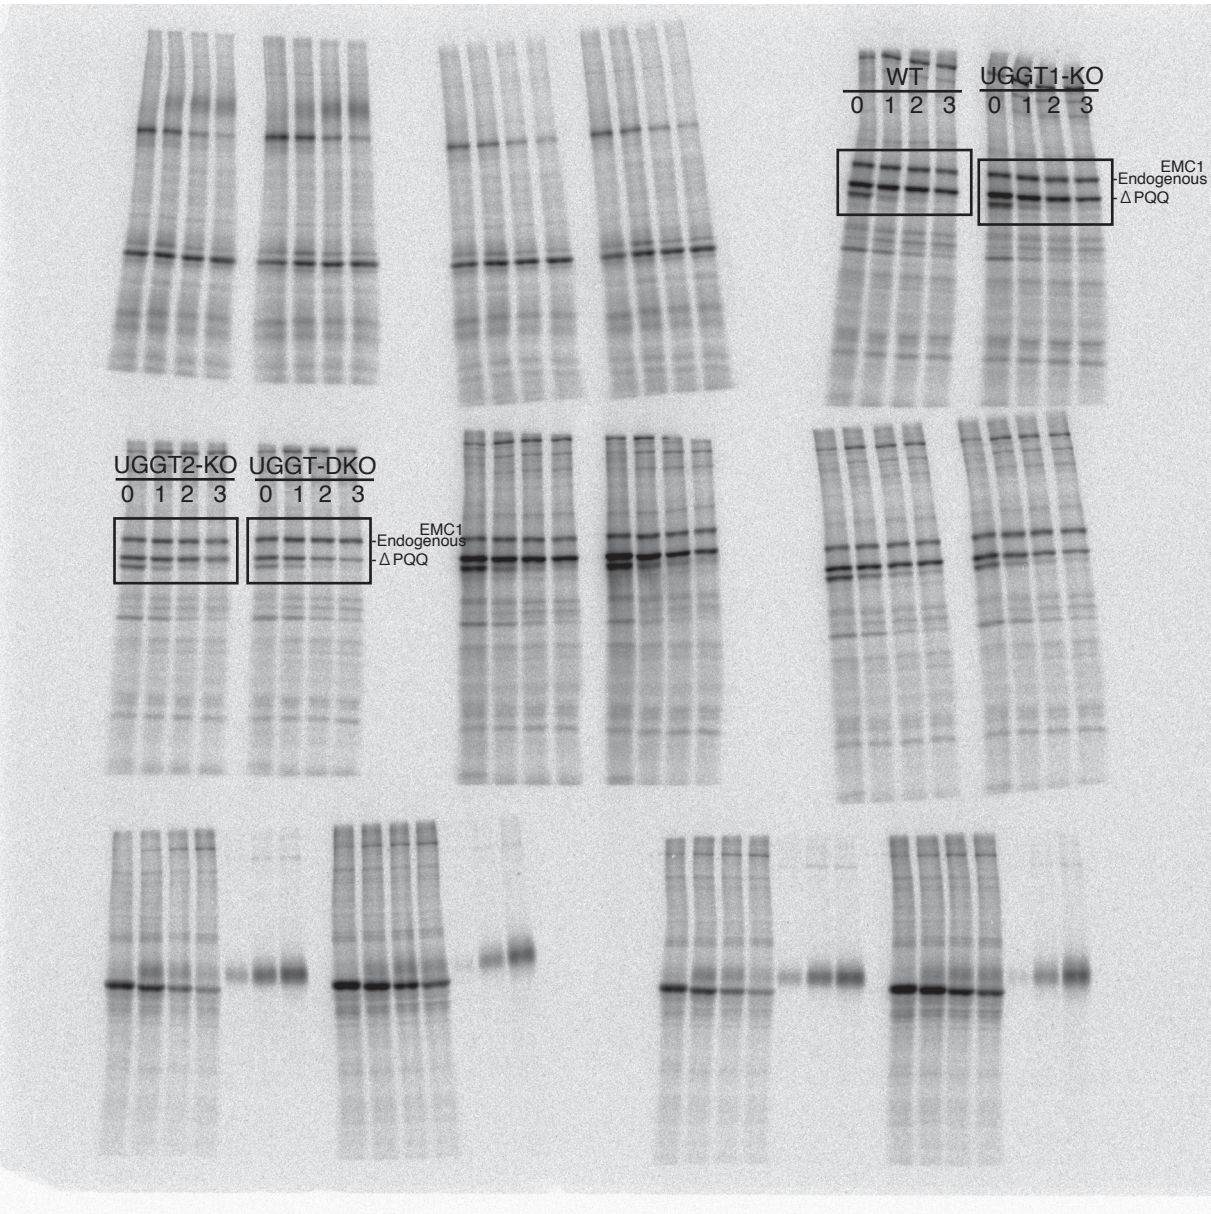

Supplement: fig3-data2 [file elife-93117-fig3-data2-v1.zip]

Fig. 3A-C Source data 2 Original membranes corresponding to Fig3A-C.

Fig. 3A

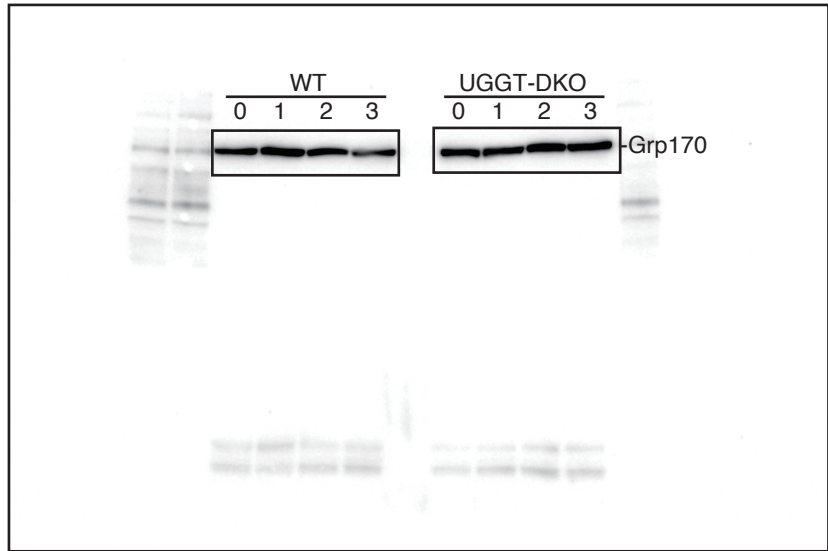

Fig. 3B

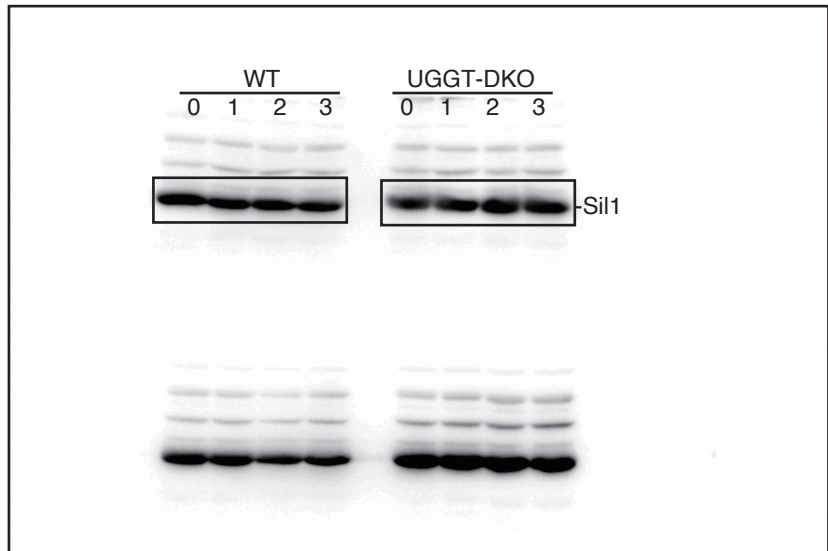

Fig. 3C

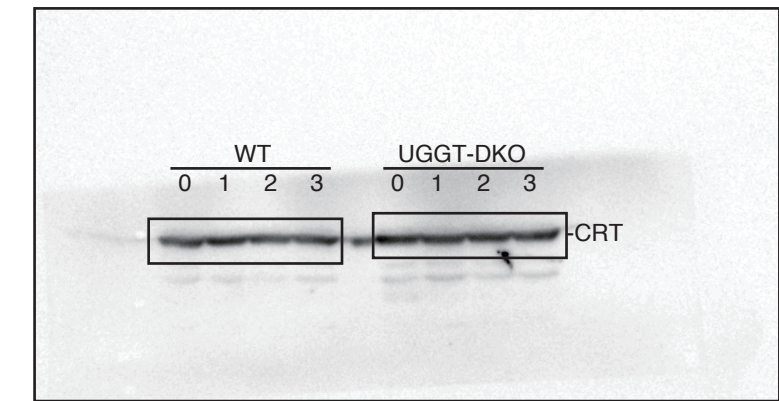

Supplement: fig3-data2 [file elife-93117-fig3-data2-v1.zip]

Fig. 4C-E Source data 2 Original membranes corresponding to Fig4C-E.

Fig. 4C

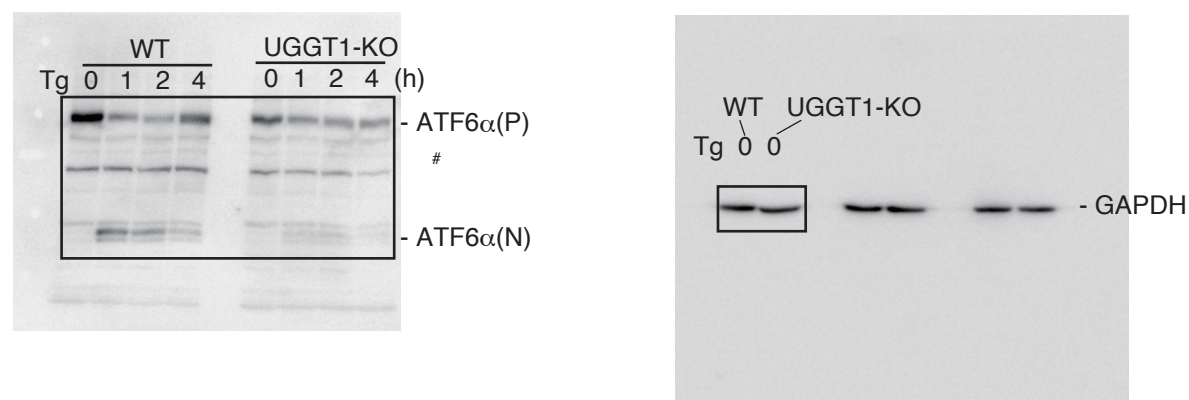

Fig. 4D

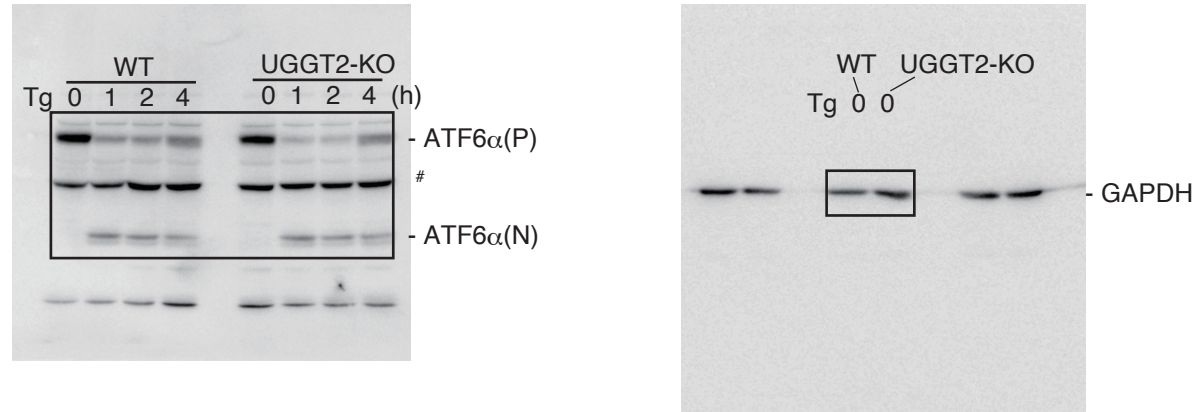

Fig. 4E

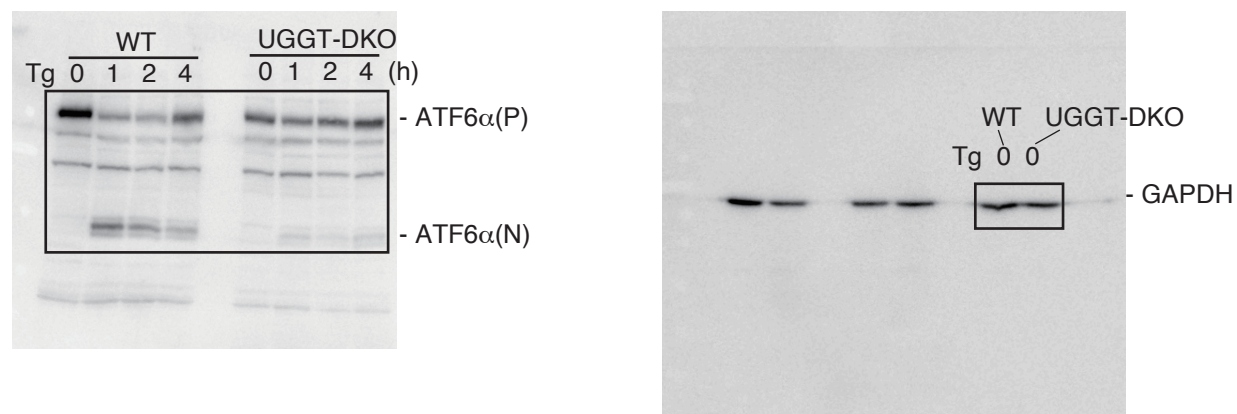

Supplement: fig4-data2 [file elife-93117-fig4-data2-v1.zip]

Fig. 4AB Source data 2 Original membranes corresponding to Fig4AB.

Fig. 4A

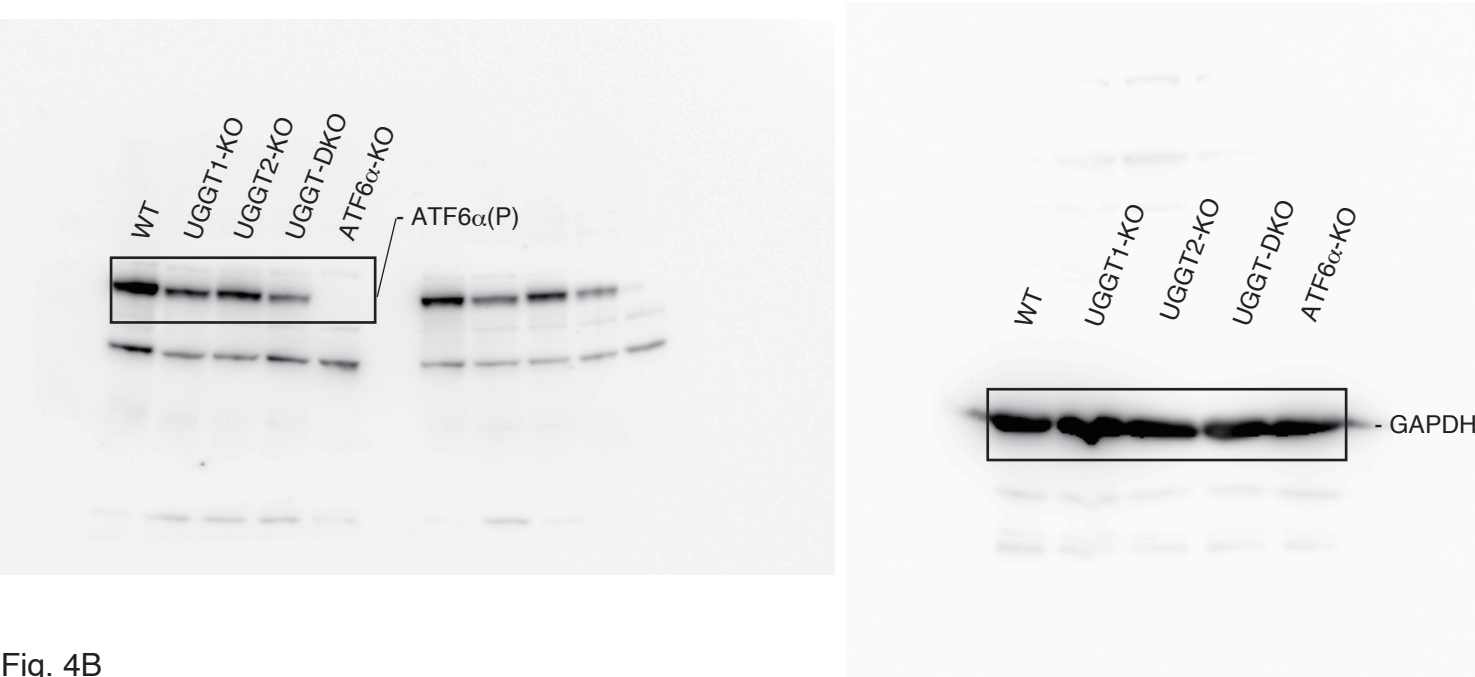

Fig. 4B

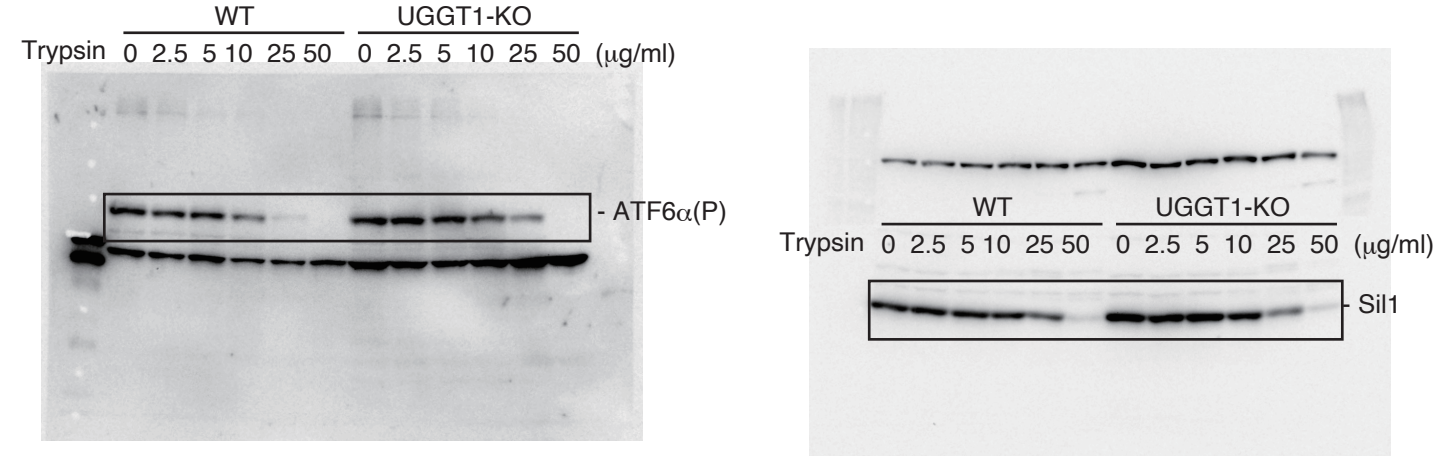

Supplement: fig4-data2 [file elife-93117-fig4-data2-v1.zip]
